# Supplementary material
Source: PubMed Central journal article supplement (PMC6917504)
Supplement: NIHMS1056606-supplement-Supporting_information.pdf [file NIHMS1056606-supplement-Supporting_information.pdf]

## **Supporting Information**

Human Concentrative Nucleoside Transporter 3 (hCNT3, SLC28A3) Forms a Cyclic Homotrimer

Adrian Stecula<sup>1\*</sup>, Avner Schlessinger<sup>5</sup>, Kathleen M. Giacomini<sup>1-4</sup>, and Andrej Sali<sup>1-3\*</sup>

<sup>1</sup>*Department of Bioengineering and Therapeutic Sciences, University of California, San Francisco, San Francisco, California 94158, U.S.A.*

<sup>2</sup>*California Institute for Quantitative Biosciences, University of California San Francisco, San Francisco, California 94158, U.S.A.*

<sup>3</sup>*Department of Pharmaceutical Chemistry, University of California San Francisco, San Francisco, California 94158, U.S.A.*

<sup>4</sup>*Institute for Human Genetics, University of California San Francisco, San Francisco, California 94158, U.S.A.*

<sup>5</sup>*Department of Pharmacological Sciences, Icahn School of Medicine at Mount Sinai, New York, New York 10029 U.S.A.*

**A**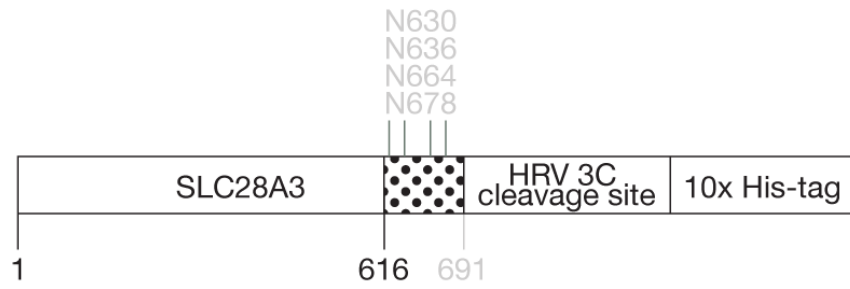**B**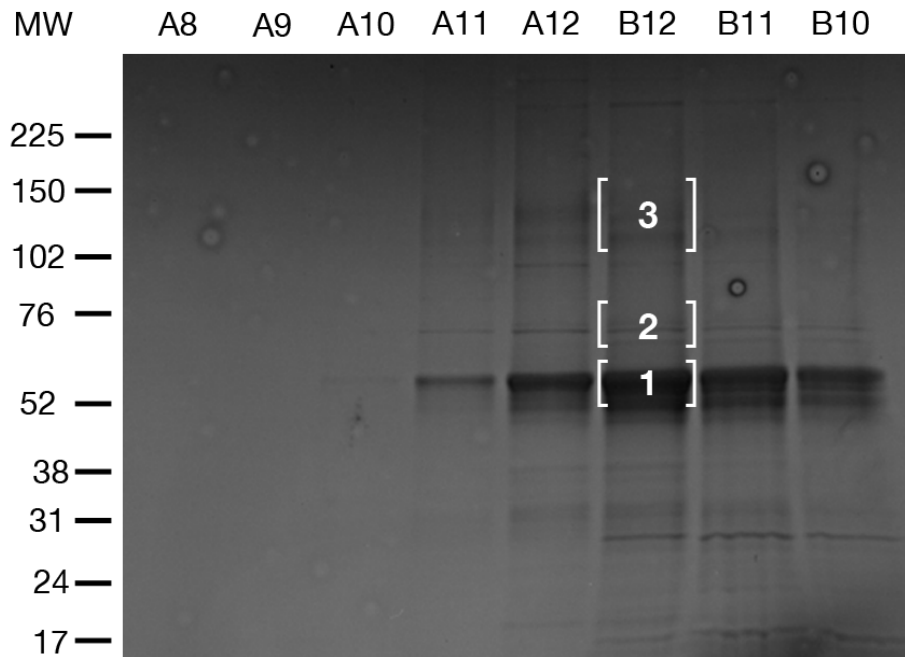

Figure S1 Expression and purification of hCNT3 from High Five insect cells. A) Schematic of the expression construct. B) Coomassie stained gel of the selected fractions, indicating the areas that were cut out for mass spectrometry analysis.

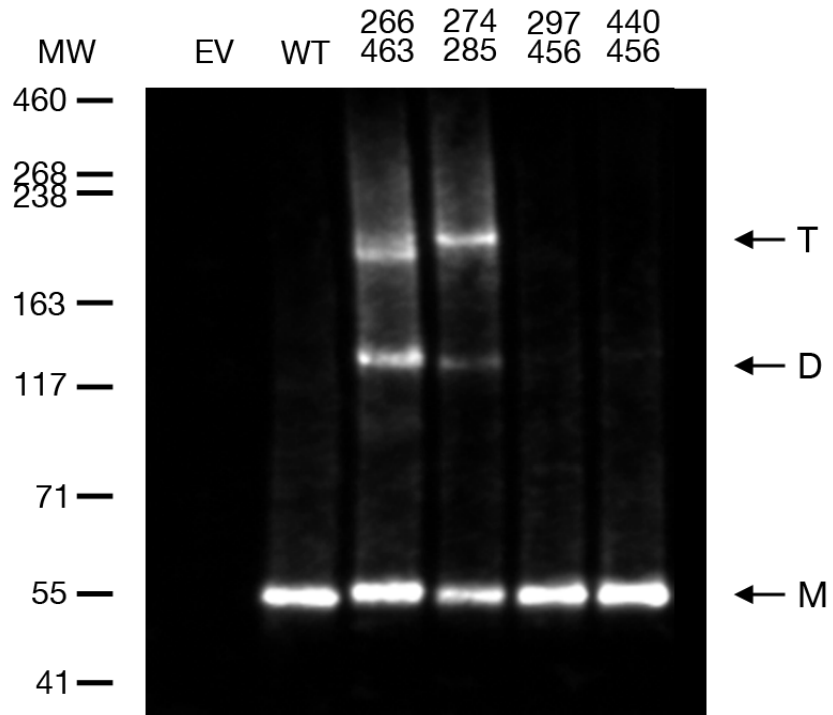

Figure S2 Western blot of the cysteine I<sub>2</sub> cross-linking experiment involving V274C/A285C, Y266C/F463C, T297C/A456C, and A440C/A456C double mutants.

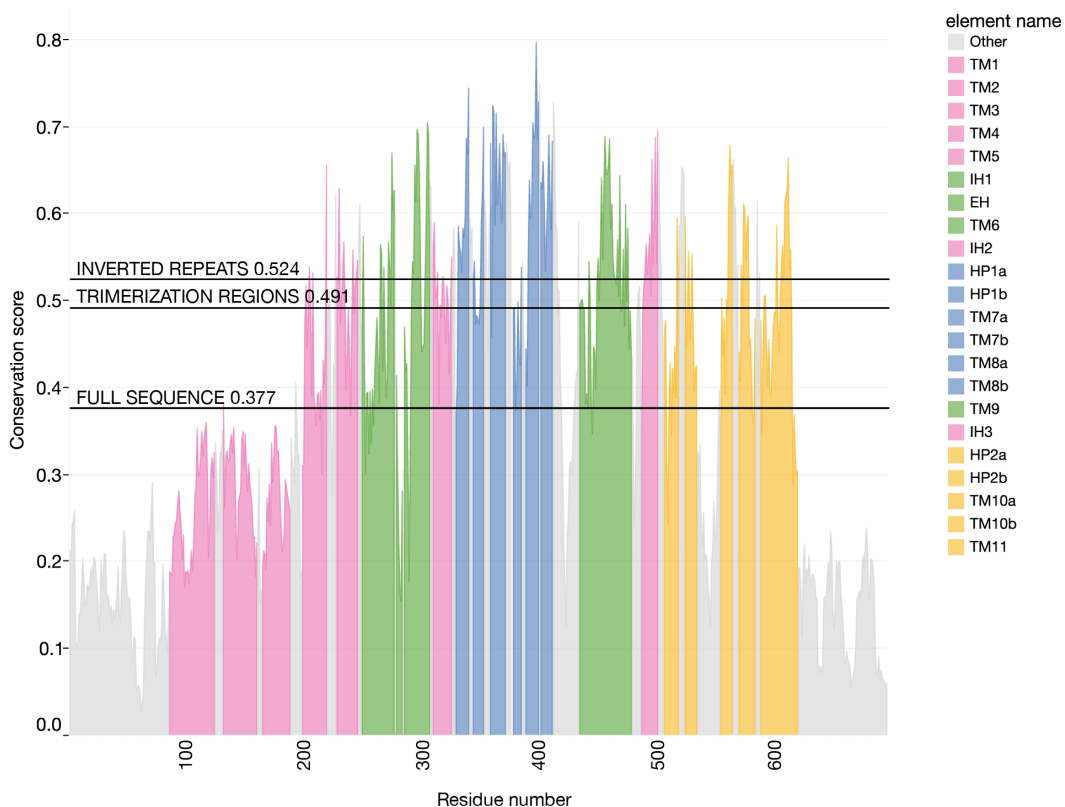

Figure S3 Graph of the sequence conservation score plotted for each residue. Colors follow the domains outlined in Figure 2A. Averages represent the full sequence, trimerization domain (IH1, EH, TM6, TM9), and inverted repeats (HP1a, HP1b, TM7a, TM7b, TM8a, TM8b, HP2a, HP2b, TM10a, TM10b, TM11). Secondary structure definitions: TM1 86-123, TM2 131-159, TM3 164-187, TM4 198-218, TM5 227-244, IH1 248-275, EH 277-282, TM6 284-305, IH2 308-323, HP1a 327-338, HP1b 342-350, TM7a 356-369, TM7b 375-382, TM8a 386-397, TM8b 399-408, TM9 432-475, IH3 484-497, HP2a 503-515, HP2b 520-530, TM10a 550-560, TM10b 566-579, TM11 584-615.



| Sample ID | UNIPROT ID | Number Unique | Peptide Count | % Sample | % Coverage | Protein MW | Species | Source | Protein Name                                                    |
|-----------|------------|---------------|---------------|----------|------------|------------|---------|--------|-----------------------------------------------------------------|
| 1         | Q9HAS3     | 16            | 114           | 97%      | 20.8       | 76931      | HUMAN   | Target | Solute carrier family 28 member 3                               |
| 1         | Q2F6C3     | 2             | 3             | 3%       | 7          | 57745.4    | BOMMO   | Insect | Chaperonin subunit 6a zeta                                      |
| 2         | Q9HAS3     | 12            | 35            | 41%      | 17.9       | 76931      | HUMAN   | Target | Solute carrier family 28 member 3                               |
| 2         | Q9U639     | 13            | 18            | 21%      | 23.8       | 71432.3    | MANSE   | Insect | Heat shock 70 kDa protein cognate 4                             |
| 2         | Q00704     | 9             | 12            | 14%      | 14.9       | 79075.9    | NPVAC   | Virus  | Occlusion-derived virus envelope protein E66                    |
| 2         | A9LST1     | 7             | 7             | 8%       | 25.1       | 35944      | SPOEX   | Insect | Activated C kinase 1 receptor                                   |
| 2         | P41473     | 4             | 4             | 5%       | 23         | 30567.3    | NPVAC   | Virus  | Uncharacterized 30.6 kDa protein in IAP2-VLF1 intergenic region |
| 2         | Q0MUU6     | 4             | 4             | 5%       | 8          | 73138.6    | TRINI   | Insect | Heat shock cognate 70 protein                                   |
| 2         | G6C119     | 3             | 3             | 3%       | 2.7        | 166194.3   | DANPL   | Insect | Eukaryotic translation initiation factor 3 subunit A            |
| 2         | D6WLZ3     | 2             | 3             | 3%       | 3.9        | 83204.3    | TRICA   | Insect | Putative uncharacterized protein                                |
| 3         | Q9HAS3     | 10            | 23            | 51%      | 18.2       | 76931      | HUMAN   | Target | Solute carrier family 28 member 3                               |
| 3         | A9LST1     | 9             | 9             | 20%      | 32.3       | 35944      | SPOEX   | Insect | Activated C kinase 1 receptor                                   |
| 3         | P41473     | 4             | 6             | 13%      | 23         | 30567.3    | NPVAC   | Virus  | Uncharacterized 30.6 kDa protein in IAP2-VLF1 intergenic region |
| 3         | G6D0K3     | 2             | 4             | 9%       | 3.1        | 142316.5   | DANPL   | Insect | Putative ubiquitin specific protease 7                          |
| 3         | A7LAG1     | 2             | 3             | 7%       | 3.1        | 112072.5   | FHV     | Virus  | Protein A                                                       |

Table S1 Table containing the identity of peptides identified in each of the samples (shown in Figure S1B) by mass spectrometry.
